# Supplementary material for: Medium- and high-intensity rTMS reduces psychomotor agitation with distinct neurobiologic mechanisms
Source: PubMed Central journal article supplement (PMC6033856; doi:10.1038/s41398-018-0129-3), 2018-07-05
Supplement: 41398_2018_129_MOESM2_ESM.pdf [file 41398_2018_129_MOESM2_ESM.pdf]

**Table S1.** Animal and Human Coil Comparisons

| Coil                    | Intensity at coil surface in mT | Intensity at cortical surface (2 mm distance from base of coil) in mT | % MSO (Magventure rat coil only) | % MT (estimated) |
|-------------------------|---------------------------------|-----------------------------------------------------------------------|----------------------------------|------------------|
| HI-rTMS coil (Rat coil) | 1200                            | 1000 (37,312)                                                         | 20                               | 100              |
| MI-rTMS coil            | 90                              | 51 (128)                                                              | NA                               | 5                |
| LI-rTMS coil            | 12                              | 4 (14)                                                                | NA                               | 0.4              |

Abbreviations: HI-rTMS, high-intensity repetitive transcranial magnetic stimulation; LI-rTMS, low-intensity repetitive transcranial magnetic stimulation; MI-rTMS, medium-intensity repetitive transcranial magnetic stimulation; mm, Millimeter; mT, Millitesla ; %MSO, percentage of maximum stimulator output; %MT, percentage of motor threshold.
